# Supplementary material for: Short-Range Charge Transfer in DNA Base Triplets: Real-Time Tracking of Coherent Fluctuation Electron Transfer
Source: MDPI journal article supplement (doi:10.3390/molecules28196802), 2023-09-25
Supplement: s1 [file s1]

## Supporting Information

### **Short-Range Charge Transfer in DNA Base Triplet: Real-Time Tracking of Coherent Fluctuation Electron**

Lixia Zhu, Qi Li, Yongfeng Wan, Meilin Guo, Lu Yan, Hang Yin and Ying Shi\*  
Institute of Atomic and Molecular Physics, Jilin University, Changchun 130012, China

Email: [shi\\_ying@jlu.edu.cn](mailto:shi_ying@jlu.edu.cn)

## Table of Contents

|                                        |    |
|----------------------------------------|----|
| Table of Contents .....                | 2  |
| Table S1 .....                         | 3  |
| Table S2 .....                         | 4  |
| Table S3 .....                         | 5  |
| Table S4 .....                         | 6  |
| Figure S1 .....                        | 7  |
| Figure S2 .....                        | 8  |
| Figure S3 .....                        | 9  |
| Figure S4 .....                        | 10 |
| The optimized coordinates of TAT ..... | 11 |
| References .....                       | 14 |
| Author Contributions .....             | 15 |

**Table S1** Select different radius values corresponding to the energy.

| Radius (Å) | Energy (eV) |
|------------|-------------|
| 2.5        | -6806.06873 |
| 3.0        | -6808.0318  |
| 3.5        | -6808.35663 |
| 4.0        | -6808.41495 |
| 4.5        | -6808.42451 |

**Table S2** Select different spacing values corresponding to the energy.

| Spacing (Å) | Energy (eV) |
|-------------|-------------|
| 0.11        | -6778.86763 |
| 0.12        | -6779.09314 |
| 0.13        | -6779.34191 |
| 0.14        | -6779.23691 |
| 0.15        | -6779.53078 |
| 0.16        | -6779.63818 |

**Table S3** The maximum absorption peak of TAT was calculated by different functionals and basis sets (Exp=260 nm<sup>[1-2]</sup>). Upper half: We change the functional, keeping the basis set TZVP. Lower half: We change the basis set keeping the functional B3LYP.

| Functional     | Absorption peak (nm) |
|----------------|----------------------|
| B3LYP          | 254                  |
| CAM-B3LYP      | 235                  |
| PBEPBE         | 381                  |
| mPW1PW191      | 246                  |
| $\omega$ B97XD | 234                  |
| Basis set      | Absorption peak (nm) |
| TZVP           | 254                  |
| 6-31G (d,p)    | 248                  |
| cc-pVTZ        | 253                  |

**Table S4** Specific proportion of charge transfer at different time.

| Charge transfer |          |
|-----------------|----------|
| 0 fs            | 14.994 % |
| 3 fs            | 3.169 %  |
| 9 fs            | 25.102 % |
| 22 fs           | 10.796 % |
| 40 fs           | 4.168 %  |
| 50 fs           | 59.817 % |
| 70 fs           | 3.513 %  |
| 90 fs           | 27.363 % |
| 100 fs          | 5.315 %  |

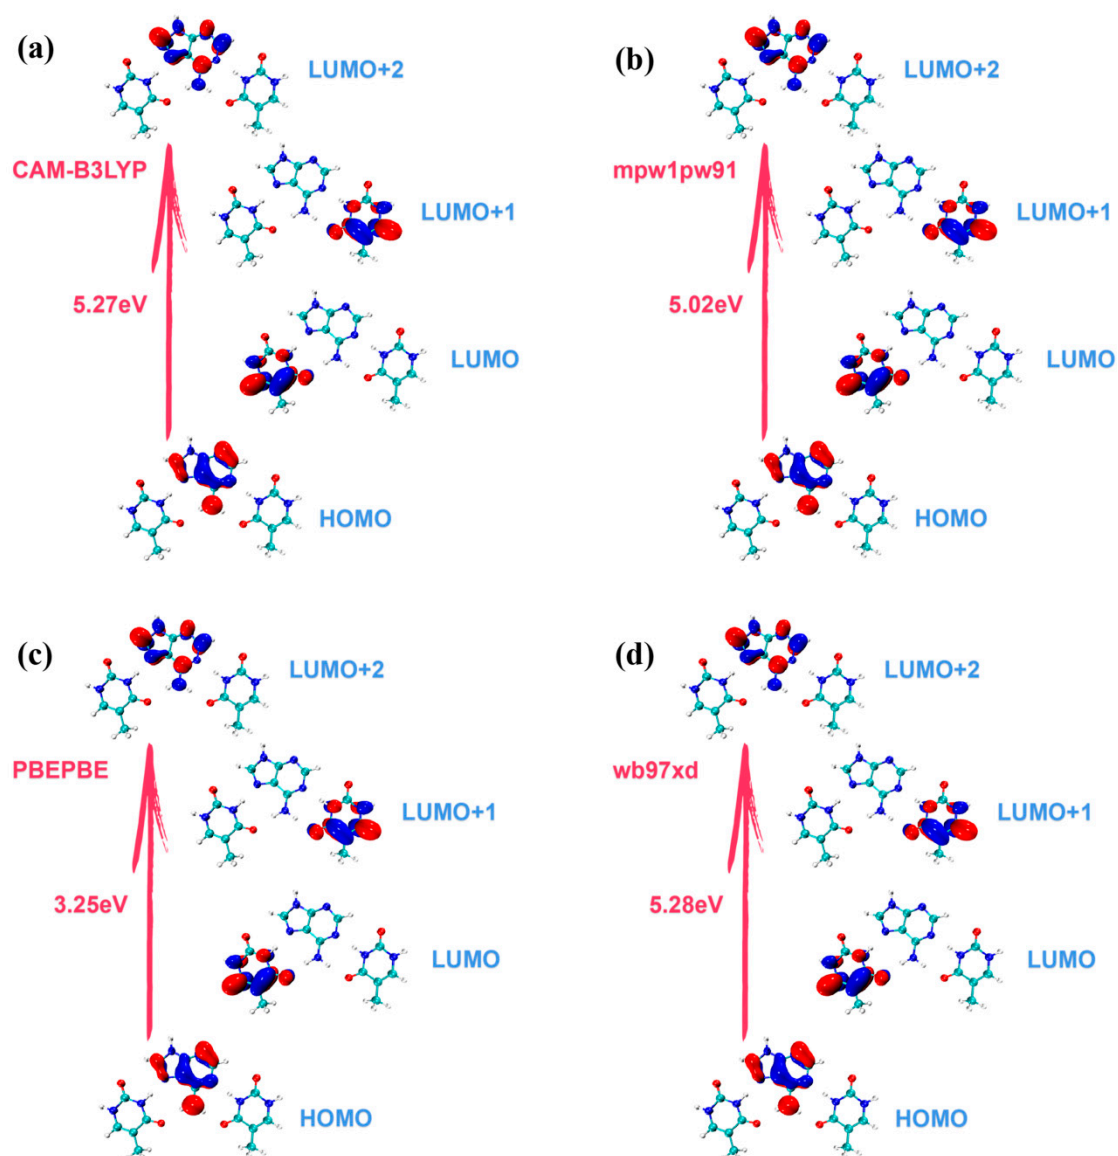

**Figure S1.** The relative molecular orbitals and energy under different functionals.

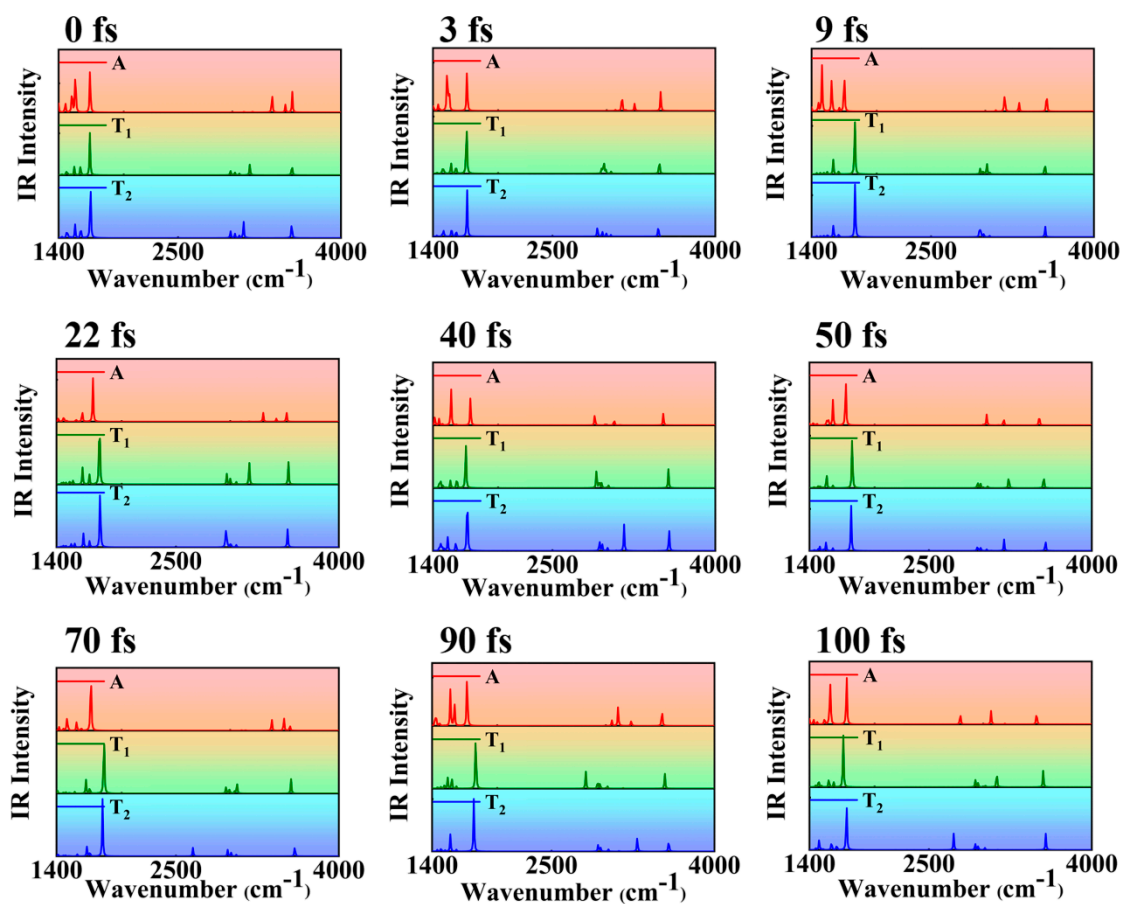

**Figure S2.** Evolution of infrared vibrational spectra of charge donor (A) and acceptor (T<sub>1</sub> and T<sub>2</sub>) over time.



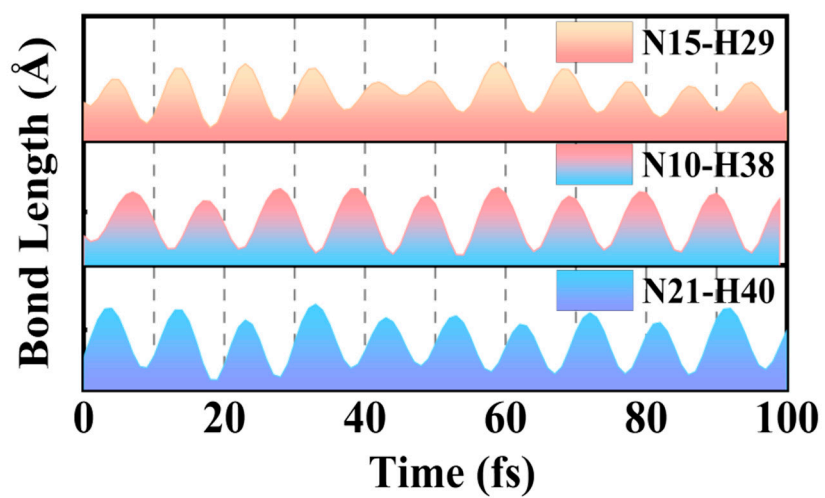

**Figure S3.** The time-dependent dynamics of N-H bonds near the hydrogen bond grid is obtained with the Gaussian 09 package at the B3LYP (TZVP) level.

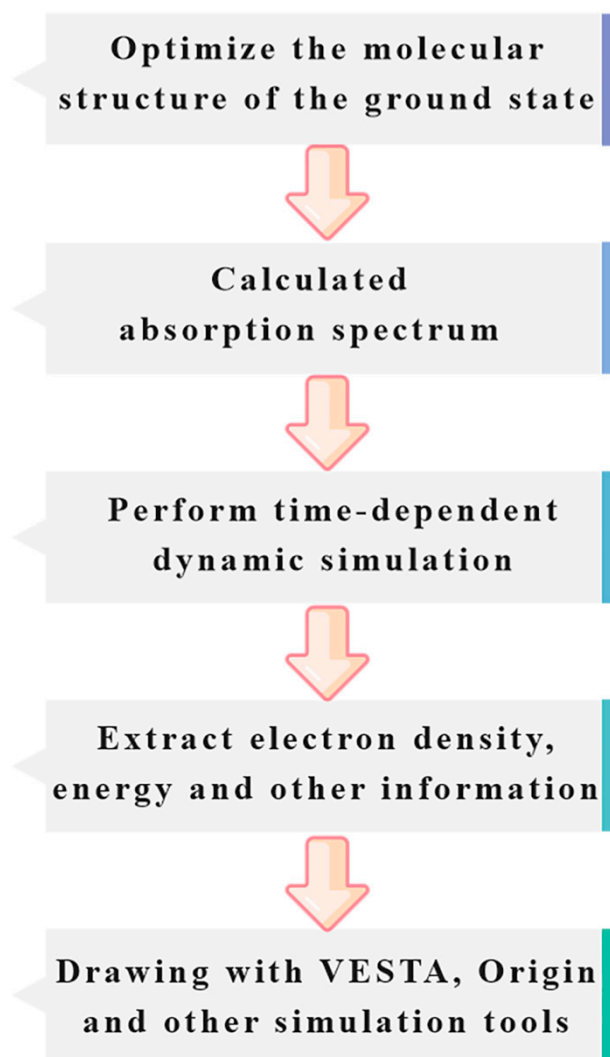

**Figure S4.** The calculation flow chart.

### **The optimized coordinates of TAT**

|   |             |             |             |
|---|-------------|-------------|-------------|
| C | -5.89783700 | -2.17518100 | -0.00087200 |
| C | -4.62064200 | -2.60547400 | -0.00007800 |
| C | -3.56198400 | -1.59388000 | 0.00072600  |
| N | -3.99034100 | -0.27162900 | 0.00071700  |
| C | -5.28873000 | 0.18239900  | -0.00018800 |
| N | -6.22855500 | -0.83930400 | -0.00095800 |
| O | -5.60168200 | 1.35944300  | -0.00029800 |
| O | -2.36417200 | -1.85814600 | 0.00143500  |
| C | -4.22633100 | -4.05023300 | -0.00000900 |
| H | -3.25076900 | 0.46115900  | 0.00092300  |
| H | -6.73832000 | -2.85715800 | -0.00151600 |
| H | -7.19201600 | -0.54339900 | -0.00146800 |
| H | -3.61773800 | -4.28745800 | -0.87522400 |
| H | -5.10478000 | -4.69683000 | -0.00069100 |
| H | -3.61891400 | -4.28770600 | 0.87595500  |
| C | -0.67008600 | 1.95401300  | 0.00024400  |
| C | 0.38675900  | 1.01135200  | -0.00029400 |
| N | 1.64417100  | 1.51654100  | -0.00074500 |
| C | 1.84010000  | 2.84300300  | -0.00061900 |
| N | 0.92363300  | 3.80549900  | -0.00011900 |
| C | -0.31262900 | 3.29981700  | 0.00026100  |

|   |             |             |             |
|---|-------------|-------------|-------------|
| N | -2.04767100 | 1.82439700  | 0.00059000  |
| C | -2.51046100 | 3.04902100  | 0.00083800  |
| N | -1.50827800 | 3.98420600  | 0.00063500  |
| N | 0.21154200  | -0.31053100 | -0.00039500 |
| H | 2.87931500  | 3.15446200  | -0.00098300 |
| H | -3.55885300 | 3.30560200  | 0.00101900  |
| H | -1.60954100 | 4.98655400  | 0.00095100  |
| H | 1.02677100  | -0.92062400 | -0.00071700 |
| H | -0.71406500 | -0.72933000 | 0.00010300  |
| C | 6.25019200  | -1.63287200 | 0.00061100  |
| C | 5.06795500  | -2.27982200 | 0.00026300  |
| C | 3.84864200  | -1.46926800 | -0.00043500 |
| N | 4.03432400  | -0.09197100 | -0.00063900 |
| C | 5.23517500  | 0.58234500  | -0.00027100 |
| N | 6.34035200  | -0.26105000 | 0.00037400  |
| O | 5.34130300  | 1.79351000  | -0.00047000 |
| O | 2.71696400  | -1.94543300 | -0.00083200 |
| C | 4.93270900  | -3.77137800 | 0.00052400  |
| H | 3.17191300  | 0.49783500  | -0.00090000 |
| H | 7.19715600  | -2.15726900 | 0.00113200  |
| H | 7.23617500  | 0.20076900  | 0.00055400  |
| H | 4.37554400  | -4.11183800 | 0.87598000  |

|   |            |             |             |
|---|------------|-------------|-------------|
| H | 5.91113800 | -4.25369600 | 0.00113200  |
| H | 4.37644100 | -4.11223200 | -0.87535100 |

## References

- [1] A. Banyasz, T. Ketola, L. Martínez-Fernández, R. Improta, D. Markovitsi, *Faraday Discuss.*, **2018**, *207*, 181-197.
- [2] F. D. Lewis, H. H. Zhu, P. Daublain, T. Fiebig, M. Raytchev, Q. Wang, V. Shafirovich, *J. Am. Chem. Soc.* **2006**, *128*, 791-800.

### **Author Contributions**

L. X. Zhu and Y. Shi conceived the research idea. Q. Li, Y. Wan, Y. F. Wan conducted data analysis. L. X. Zhu wrote the original manuscript. M. L. Guo, L. Yan, H. Yin checked the manuscript. All authors discussed the results and commented on the manuscript.
